# Supplementary material for: Statins and Histone Deacetylase Inhibitors Affect Lamin A/C – Histone Deacetylase 2 Interaction in Human Cells
Source: PubMed Central journal article supplement (PMC6365888; doi:10.3389/fcell.2019.00006), 2019-01-31
Supplement: Data_Sheet_1.pdf [file Data_Sheet_1.pdf]

## Supplementary Material

### Statins and histone deacetylase inhibitors affect lamin A/C - histone deacetylase 2 interaction in human cells

Elisabetta Mattioli<sup>1,2</sup>, Davide Andrenacci<sup>1,2</sup>, Antonello Mai<sup>3</sup>, Sergio Valente<sup>3</sup>, Joke Robijns<sup>4</sup>, Winnok H. De Vos<sup>4</sup>, Cristina Capanni<sup>1,2</sup> and Giovanna Lattanzi<sup>1,2\*</sup>

\* **Correspondence:** Corresponding Author: giovanna.lattanzi@cnr.it

#### 1.1 Supplementary Figures

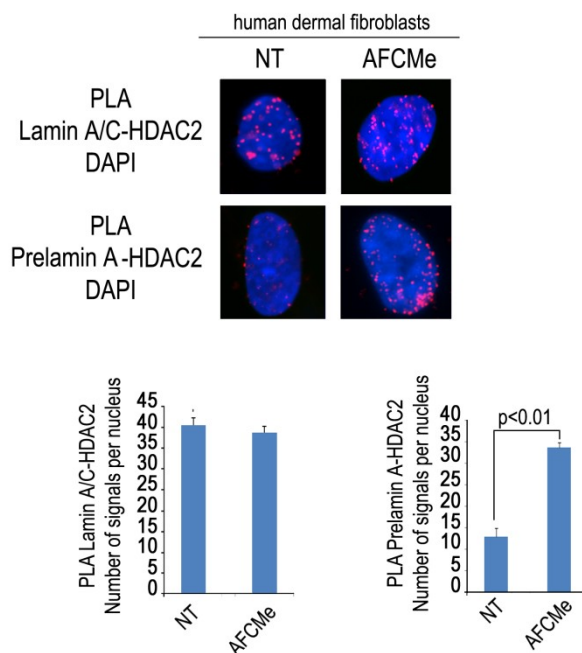

**Supplementary figure 1. AFCMe induces accumulation of farnesylated prelamin A, but does not affect lamin A/C-HDAC2 interaction.** PLA of lamin A/C and HDAC2 or prelamin A and HDAC2 in human dermal fibroblasts left untreated (NT) or treated with AFCMe (AFCMe). Nuclei are counterstained with DAPI. Quantitative analysis of PLA signals (red dots) is reported in the graphs. Statistical significance ( $p < 0.01$ ) is indicated.
